# Supplementary material
Source: Springer Nature journal article supplement (https://www.springermedizin.de/resource/supplementary/13019_2009_214_MOESM3_ESM.pdf/9638090)

# PLTs

$\times 10^3/\mu\text{l}$

700,00

600,00

500,00

400,00

300,00

200,00

100,00

0,00

1

2

3

4

5

6

7

8

9

10

11

12

13

14

15

16

17

18

GROUP: I (1-6), II (7-12), III (13-18)

◆ phase 1

■ phase 7

▲ phase 8

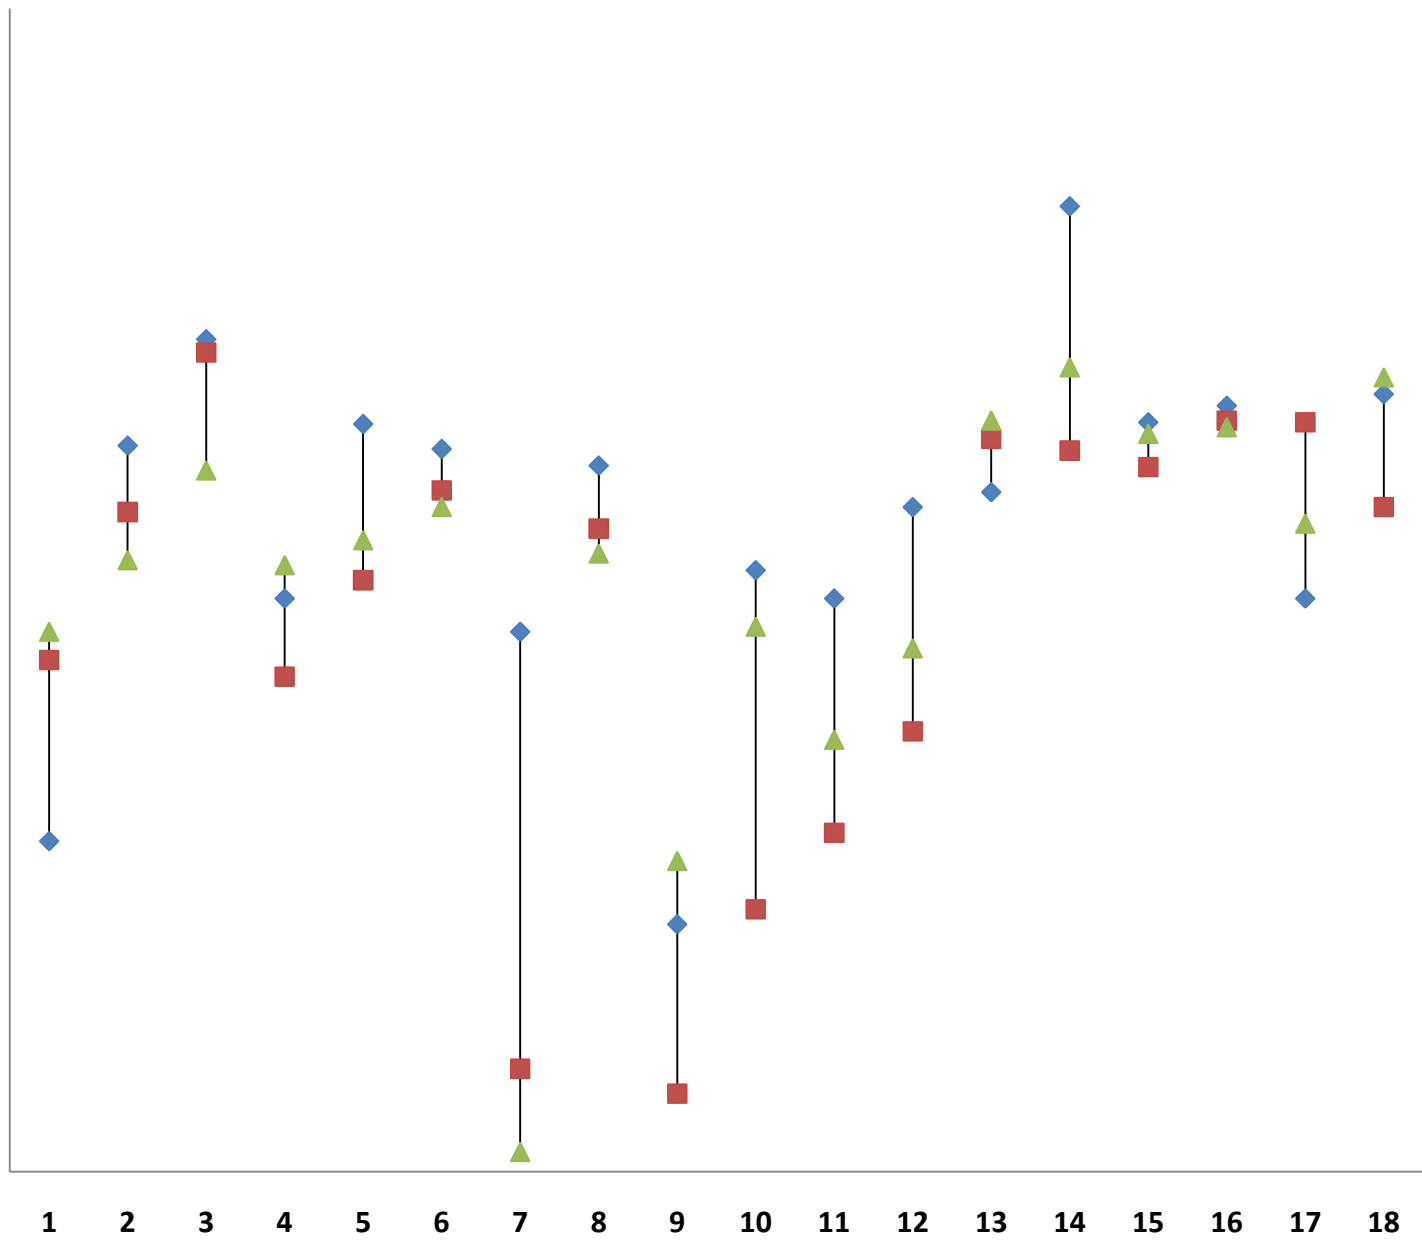

Supplement: MOESM3 [file 9638090]
